# Supplementary material for: Genetic Characterization and Comparative Genome Analysis ofBrucella melitensisIsolates from India
Source: Hindawi journal article supplement (doi:10.1155/2016/3034756), 2016-01-01
Supplement: f1 [file 3034756.f1.pdf]

## Supplimentary Data

**Supplementary Table 1.** Details on sources of *Brucella melitensis* isolates and studies performed.

| Sample  | Source                                 | Study                          |
|---------|----------------------------------------|--------------------------------|
| Bm IND1 | Aborted goat fetus                     | MLST and whole genome analysis |
| Bm IND2 | Vaginal swab of aborted goat           | MLST                           |
| Bm IND3 | Stomach content of aborted sheep fetus | MLST                           |
| Bm IND4 | Vaginal swab of aborted sheep          | MLST                           |

**Supplementary Table 2.** SNPs identified using Next Generation Sequencing (NGS) data of Bm IND1 against completely sequenced *B. melitensis* strains. Only well-defined and characterized genome sequences of *B. melitensis* strains were used for the purpose of selecting closely related reference genome for Bm IND1.

| <b>B. melitensis strains</b>          | <b>Number of SNPs</b> |
|---------------------------------------|-----------------------|
| <i>Brucella melitensis</i> 16M        | 2976                  |
| <i>Brucella melitensis</i> M28        | 330                   |
| <i>Brucella melitensis</i> M5-90      | 442                   |
| <i>Brucella melitensis</i> NI         | 474                   |
| <i>Brucella melitensis</i> ATCC 23457 | 280                   |
| <i>Brucella melitensis</i> ether      | 3000                  |
| <i>Brucella abortus</i> 2308          | 6588                  |

17 **Supplementary Table 3.** Repertoire of protein coding genes in different strains of *B. melitensis*  
18 and one *B. abortus* strain.

| S. No | Organism                                      | GenBank Assembly ID | Number of gene |
|-------|-----------------------------------------------|---------------------|----------------|
| 1     | <i>Brucella melitensis</i> bv. 1 str. 16M     | GCA_000007125.1     | 3198           |
| 2     | <i>Brucella melitensis</i> ATCC 23457         | GCA_000022625.1     | 3136           |
| 3     | <i>Brucella melitensis</i> bv. 1 str. Rev.1   | GCA_000158695.1     | 3220           |
| 4     | <i>Brucella melitensis</i> bv. 3 str. Ether   | GCA_000158735.1     | 3237           |
| 5     | <i>Brucella melitensis</i> bv. 1 str. 16M (1) | GCA_000160295.1     | 3083           |
| 6     | <i>Brucella melitensis</i> bv. 2 str. 63/9    | GCA_000182235.1     | 3207           |
| 7     | <i>Brucella melitensis</i> M28                | GCA_000192725.1     | 3363           |
| 8     | <i>Brucella melitensis</i> M5-90              | GCA_000192885.1     | 3360           |
| 9     | <i>Brucella melitensis</i> NI                 | GCA_000227645.1     | 3229           |
| 10    | <i>Brucella melitensis</i> F15/06-7           | GCA_000365845.1     | 3154           |
| 11    | <i>Brucella melitensis</i> B115               | GCA_000365865.1     | 3144           |
| 12    | <i>Brucella melitensis</i> UK22/06            | GCA_000366585.1     | 3091           |
| 13    | <i>Brucella melitensis</i> CNGB 1076          | GCA_000366625.1     | 3140           |
| 14    | <i>Brucella melitensis</i> 64/150             | GCA_000366845.1     | 3147           |
| 15    | <i>Brucella melitensis</i> 66/59              | GCA_000366865.1     | 3143           |
| 16    | <i>Brucella melitensis</i> CNGB 1120          | GCA_000366885.1     | 3143           |
| 17    | <i>Brucella melitensis</i> CNGB 290           | GCA_000366905.1     | 3138           |

|    |                                       |                 |      |
|----|---------------------------------------|-----------------|------|
| 18 | <i>Brucella melitensis</i> F10/05-2   | GCA_000366925.1 | 3167 |
| 19 | <i>Brucella melitensis</i> F2/06-6    | GCA_000366945.1 | 3147 |
| 20 | <i>Brucella melitensis</i> F3/02      | GCA_000366965.1 | 3139 |
| 21 | <i>Brucella melitensis</i> F5/07-239A | GCA_000366985.1 | 3153 |
| 22 | <i>Brucella melitensis</i> F6/05-6    | GCA_000367005.1 | 3140 |
| 23 | <i>Brucella melitensis</i> R3/07-2    | GCA_000367025.1 | 3152 |
| 24 | <i>Brucella melitensis</i> UK19/04    | GCA_000367045.1 | 3144 |
| 25 | <i>Brucella melitensis</i> BG2 (S27)  | GCA_000370625.1 | 3139 |
| 26 | <i>Brucella melitensis</i> F1/06 B10  | GCA_000370645.1 | 3146 |
| 27 | <i>Brucella melitensis</i> F10/06-16  | GCA_000370665.1 | 3143 |
| 28 | <i>Brucella melitensis</i> F8/01-155  | GCA_000370685.1 | 3147 |
| 29 | <i>Brucella melitensis</i> F9/05      | GCA_000370705.1 | 3144 |
| 30 | <i>Brucella melitensis</i> UK14/06    | GCA_000370725.1 | 3144 |
| 31 | <i>Brucella melitensis</i> UK22/04    | GCA_000370745.1 | 3158 |
| 32 | <i>Brucella melitensis</i> UK23/06    | GCA_000370765.1 | 3137 |
| 33 | <i>Brucella melitensis</i> Uk24/06    | GCA_000370785.1 | 3147 |
| 34 | <i>Brucella melitensis</i> UK29/05    | GCA_000370805.1 | 3156 |
| 35 | <i>Brucella melitensis</i> UK3/06     | GCA_000370825.1 | 3152 |
| 36 | <i>Brucella melitensis</i> UK31/99    | GCA_000370845.1 | 3164 |
| 37 | <i>Brucella melitensis</i> UK37/05    | GCA_000370865.1 | 3147 |

---

|    |                                                   |                 |      |
|----|---------------------------------------------------|-----------------|------|
| 38 | <i>Brucella melitensis</i> 02-7258                | GCA_000479975.1 | 3151 |
| 39 | <i>Brucella melitensis</i> 02-5863-1              | GCA_000480095.1 | 3151 |
| 40 | <i>Brucella melitensis</i> 11-1823-3434           | GCA_000480215.1 | 3156 |
| 41 | <i>Brucella melitensis</i> bv. 3 str. Ether (1)   | GCA_000740355.1 | 3090 |
| 42 | <i>Brucella melitensis</i> bv. 2 str. 63/9        | GCA_000740395.1 | 3118 |
| 43 | <i>Brucella melitensis</i> bv. 1 str. 16M (2)     | GCA_000740415.1 | 3110 |
| 44 | <i>Brucella melitensis</i><br>Human/CT/US/1995    | GCA_000988815.1 | 3024 |
| 45 | <i>Brucella melitensis</i> Bme20236               | GCA_001431745.1 | 3155 |
| 46 | <i>Brucella melitensis</i> BRUC048                | GCA_001608355.1 | 2994 |
| 47 | <i>Brucella melitensis</i> BRUC101                | GCA_001608425.1 | 3000 |
| 48 | <i>Brucella melitensis</i> bv. 3 IND1             | In this study   | 3313 |
| 49 | <i>Brucella melitensis</i> biovar Abortus<br>2308 | GCA_000054005.1 | 3034 |

---

19

20

21

22

23

24

25

26

27 **Supplementary Table 4.** VNTRs detected in the genome of Bm IND1 and their comparison with other *B.melitensis* strains.

| ID             | Locus        | Copy number |       |             | Consensus Size | Consensus Sequence    |
|----------------|--------------|-------------|-------|-------------|----------------|-----------------------|
|                |              | BmIND1      | Bm 28 | Bm ADMAS-G1 |                |                       |
| <b>VNTR-01</b> | chr1:1036719 | 2.5         | 2.5   | 2.5         | 11             | CAGCGACAGGC           |
| <b>VNTR-02</b> | chr1:105775  | 2.1         | 2.1   | NA          | 19             | CGCTTCCTTCAACCGCGAT   |
| <b>VNTR-03</b> | chr1:107329  | 2.8         | 2.8   | NA          | 12             | ATGAAACCCGCA          |
| <b>VNTR-04</b> | chr1:1085260 | 3.3         | 3.3   | 3.3         | 15             | TTGAAGTTGCCAATA       |
| <b>VNTR-05</b> | chr1:1085272 | 2.8         | 2.8   | 2.8         | 15             | ATATTGAAATTGCCA       |
| <b>VNTR-06</b> | chr1:1141914 | 1.9         | 1.9   | NA          | 16             | CGCTGGCGCTTTCATG      |
| <b>VNTR-07</b> | chr1:1142833 | 2           | 2     | NA          | 21             | GTATGGTAAGTGACGCAAGCT |
| <b>VNTR-08</b> | chr1:1184601 | 2.8         | 2.8   | NA          | 18             | GAACAGAATGATTGGCCA    |
| <b>VNTR-09</b> | chr1:1185243 | 2.2         | 2.2   | NA          | 18             | GATGAAGATTTCTTCAAC    |
| <b>VNTR-10</b> | chr1:1206886 | 2.4         | 2.4   | NA          | 18             | AAGAAGGCGGCGCCGAAG    |
| <b>VNTR-11</b> | chr1:1221963 | 2           | 2     | NA          | 14             | GCGGATAGTTTTTC        |
| <b>VNTR-12</b> | chr1:1260282 | 1.9         | 1.9   | 1.9         | 15             | GCCCCTGTGATTTTC       |
| <b>VNTR-13</b> | chr1:1283476 | 2.4         | 3.4   | NA          | 12             | GGCAACAGCAAG          |
| <b>VNTR-14</b> | chr1:1289514 | 2           | 2     | NA          | 13             | GCATTGCTTCGGG         |
| <b>VNTR-15</b> | chr1:1322149 | 2.1         | 2.1   | 2.1         | 15             | GGCGCTGCTGATGGC       |
| <b>VNTR-16</b> | chr1:134832  | 2.9         | 2.9   | NA          | 15             | CGGAGGACATGGTGG       |
| <b>VNTR-17</b> | chr1:147602  | 1.9         | 1.9   | NA          | 18             | GACCATCATCACGACCAT    |
| <b>VNTR-18</b> | chr1:1575849 | 1.9         | 1.9   | NA          | 20             | TAGAGCATTTCCAGCAAATC  |
| <b>VNTR-19</b> | chr1:1632045 | 2           | 2     | NA          | 15             | GGCGATCACAAGGGC       |
| <b>VNTR-20</b> | chr1:164304  | 3.3         | 3.3   | NA          | 12             | TGATCGTGATGA          |
| <b>VNTR-21</b> | chr1:1676829 | 2           | 2     | NA          | 15             | GCGTCTGGGTTTCGG       |
| <b>VNTR-22</b> | chr1:1733517 | 1.9         | 1.9   | NA          | 16             | TCCCCTACTCCCTTAT      |
| <b>VNTR-23</b> | chr1:1733551 | 4.2         | 4.2   | NA          | 8              | TACTGCCT              |
| <b>VNTR-24</b> | chr1:1733554 | 2.1         | 2.1   | NA          | 16             | TGCCTTACTGCCCTAT      |
| <b>VNTR-25</b> | chr1:1763142 | 2.8         | 2.8   | NA          | 13             | TGGCTAACCTTTC         |

|                |              |      |     |     |    |                                |
|----------------|--------------|------|-----|-----|----|--------------------------------|
| <b>VNTR-26</b> | chr1:1942686 | 3.2  | 2.2 | NA  | 12 | GCGGGTAAACGG                   |
| <b>VNTR-27</b> | chr1:2031740 | 2.6  | 2.6 | 2.6 | 15 | CGATTCTGGTTGCCA                |
| <b>VNTR-28</b> | chr1:209539  | 2    | 2   | NA  | 14 | GAATTGCAAATGGC                 |
| <b>VNTR-29</b> | chr1:2104903 | 2    | NA  | 2   | 15 | CCCACCGGACTTGGC                |
| <b>VNTR-30</b> | chr1:349456  | 3.2  | 3.2 | NA  | 12 | GGCGGGAGAAAG                   |
| <b>VNTR-31</b> | chr1:356129  | 1.9  | 1.9 | NA  | 18 | TTTTGAAAGGGTTTCGCC             |
| <b>VNTR-32</b> | chr1:374624  | 2    | NA  | NA  | 29 | TAAGGCAATAGGGCAATAGGGCAGTATGT  |
| <b>VNTR-33</b> | chr1:374718  | 4.1  | 9.1 | NA  | 8  | ACTGCCCT                       |
| <b>VNTR-34</b> | chr1:376516  | 1.9  | 1.9 | NA  | 29 | TTAAGGCAATAGGGCAATAAGGCAGTATG  |
| <b>VNTR-35</b> | chr1:376546  | 1.9  | 1.9 | 1.9 | 16 | TAAGGGAATAGGGGAA               |
| <b>VNTR-36</b> | chr1:376618  | 10.4 | 8.4 | NA  | 8  | ACTGCCCT                       |
| <b>VNTR-37</b> | chr1:405288  | 1.9  | 1.9 | NA  | 18 | TCGCGCTTGCCGCTTCCA             |
| <b>VNTR-38</b> | chr1:48954   | 2.2  | 2.2 | NA  | 15 | CCCATGCCGGTCACG                |
| <b>VNTR-39</b> | chr1:509677  | 2.4  | 2.4 | NA  | 17 | GCGCAGCCTTGCCCGCC              |
| <b>VNTR-40</b> | chr1:589765  | 2.8  | 2.8 | NA  | 24 | AAGGATGGCAGAAAATGCCCGACC       |
| <b>VNTR-41</b> | chr1:605931  | 1.9  | 1.9 | NA  | 18 | CCGTAGCTGCCGCTTCCC             |
| <b>VNTR-42</b> | chr1:639735  | 2    | 2   | NA  | 24 | TTGTTGAAGGCGCTTGCCAGGGCA       |
| <b>VNTR-43</b> | chr1:671856  | 2    | 2   | NA  | 22 | GTTTGCCCCTGCTTGCGGGTTT         |
| <b>VNTR-44</b> | chr1:762258  | 3.2  | 3.2 | NA  | 30 | GGCCAGACTGGCCGCGTCTGAAAATAATGG |
| <b>VNTR-45</b> | chr1:771875  | 1.9  | 1.9 | NA  | 16 | TAAGGGAATAGGGGAA               |
| <b>VNTR-46</b> | chr1:771946  | 5.5  | 6.5 | NA  | 8  | TACTGCCC                       |
| <b>VNTR-47</b> | chr1:778994  | 2    | 2   | NA  | 20 | TACCGCGCGAGGCGGCCCGT           |
| <b>VNTR-48</b> | chr1:799043  | 2    | 2   | NA  | 15 | CTTGCTGGTTCTGGG                |
| <b>VNTR-49</b> | chr1:828925  | 2    | 2   | NA  | 21 | AGGAAGCGAAAGCGCGCTTGC          |
| <b>VNTR-50</b> | chr1:85345   | 3    | 3   | NA  | 13 | GCAGAGTTAGTGG                  |
| <b>VNTR-51</b> | chr1:881282  | 2.2  | 2.2 | 2.2 | 16 | GTAAGGCAATAAGGCA               |
| <b>VNTR-52</b> | chr1:891503  | 3.8  | 3.8 | 3.8 | 8  | AGGGGAAT                       |
| <b>VNTR-53</b> | chr1:949475  | 1.9  | 1.9 | 1.9 | 16 | CATGGAACAGCAGCGC               |
| <b>VNTR-54</b> | chr2:1007937 | 2.1  | 2.1 | 2.1 | 17 | ACACAGGGCCGGTACAA              |

|                |              |     |     |     |    |                              |
|----------------|--------------|-----|-----|-----|----|------------------------------|
| <b>VNTR-55</b> | chr2:1036911 | 2.7 | NA  | NA  | 12 | GCCTTGGGGGGG                 |
| <b>VNTR-56</b> | chr2:1045666 | 11  | 7   | NA  | 8  | GGGCAGTG                     |
| <b>VNTR-57</b> | chr2:1045821 | 4.4 | 4.4 | NA  | 8  | TACTGCCT                     |
| <b>VNTR-58</b> | chr2:1050460 | 2.9 | 2.9 | NA  | 17 | GATCATCATCACCATGG            |
| <b>VNTR-59</b> | chr2:1050463 | 2.2 | 2.2 | NA  | 15 | CATCATCACCATGGG              |
| <b>VNTR-60</b> | chr2:1050493 | 2.6 | 2.6 | NA  | 15 | CATGACCATCACCAT              |
| <b>VNTR-61</b> | chr2:1051972 | 6   | 9   | NA  | 8  | GGGCAGTG                     |
| <b>VNTR-62</b> | chr2:1052060 | 1.9 | 1.9 | NA  | 16 | TCCCCTACTCCCTTAT             |
| <b>VNTR-63</b> | chr2:1086220 | 2.1 | 2.1 | 2.1 | 18 | GCAGGCAGCACAGAACAG           |
| <b>VNTR-64</b> | chr2:1089799 | 2.5 | 2.5 | 2.5 | 28 | GCACGCTCATCGTGCCGTAATAAAAGAA |
| <b>VNTR-65</b> | chr2:115304  | 3.8 | 3.8 | NA  | 15 | TTCATGGCGTCGCCT              |
| <b>VNTR-66</b> | chr2:164963  | 2.1 | 2.1 | NA  | 12 | CGATCTTGCCGT                 |
| <b>VNTR-67</b> | chr2:170184  | 8.1 | 6.1 | NA  | 8  | ATTCCCCT                     |
| <b>VNTR-68</b> | chr2:217770  | 1.9 | 1.9 | NA  | 18 | GCAATGACCAGAAAGGAA           |
| <b>VNTR-69</b> | chr2:290120  | 2   | 2   | NA  | 20 | GAAGCAGAAAGCGCCAGCAA         |
| <b>VNTR-70</b> | chr2:330625  | 2.2 | 2.2 | NA  | 21 | TGCTGAAATAGCCGATGACCA        |
| <b>VNTR-71</b> | chr2:453544  | 3.1 | NA  | NA  | 12 | GTTCATCGCCGC                 |
| <b>VNTR-72</b> | chr2:667985  | 2   | 2   | 2   | 22 | CGATATCGAGCGCACCAACGGT       |
| <b>VNTR-73</b> | chr2:711337  | 1.9 | 1.9 | 1.9 | 13 | TGTGAAGATGCGA                |
| <b>VNTR-74</b> | chr2:826002  | 5.4 | 4.4 | NA  | 8  | TAAGGGAG                     |
| <b>VNTR-75</b> | chr2:832157  | 2.3 | 3.3 | 2.3 | 12 | GGCATCATGGCG                 |
| <b>VNTR-76</b> | chr2:93813   | 2   | 2   | NA  | 20 | ATCAACTATCTGCGCGAAAG         |
| <b>VNTR-77</b> | chr2:93819   | 2.3 | 2.3 | NA  | 20 | TATCTGCGCGAAAGACCAAC         |
| <b>VNTR-78</b> | chr2:958168  | 2   | 2   | 2   | 21 | TCGGATTGGTTTATCAAAATG        |

---

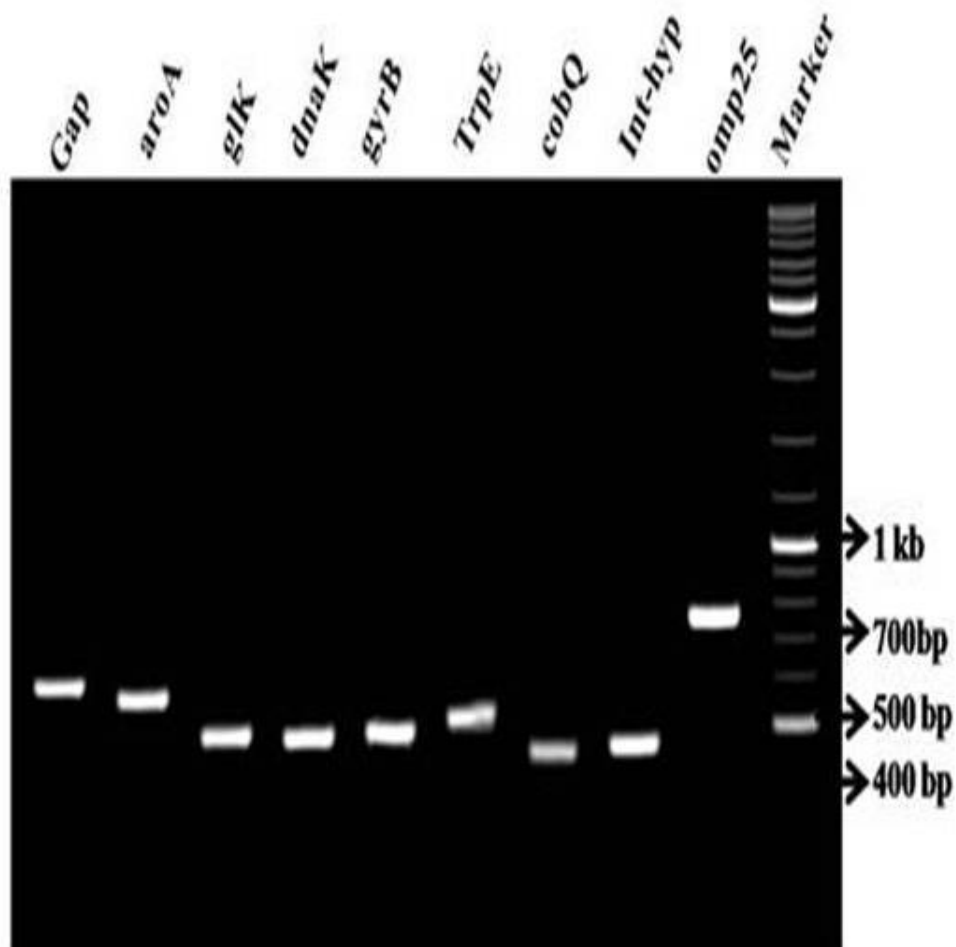

**Supplementary Figure 1.** Gel photo showing the amplification of nine loci from *B. melitensis* IND1 strain. Amplification of nine loci from *B. melitensis* IND1 strain for MLST analysis.



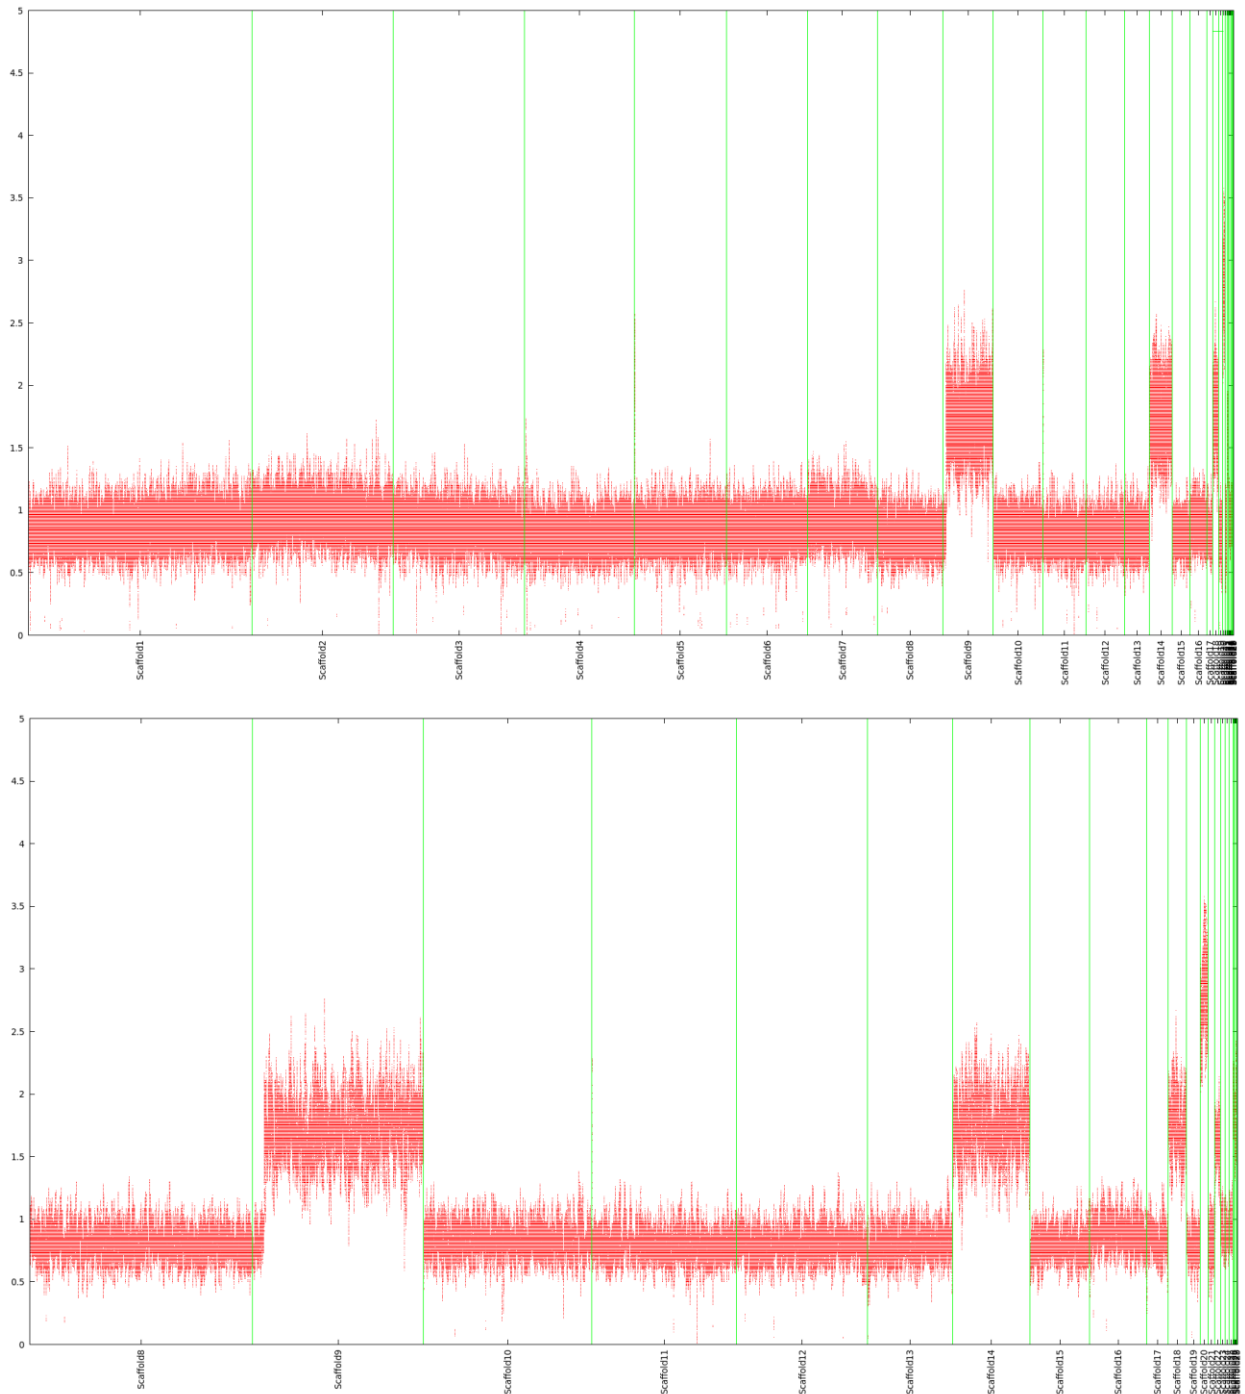

**Supplementary Figure 2. The depth coverage of each scaffold of Bm IND1 genome.** (a) X-axis shows the relative length of scaffolds and Y axis represents each position covered with number of reads on a scale of 100. Chart was generated using GNUplot. Scaffold 9, scaffold 14 and scaffold 18 are showing higher coverage. Scaffold 20 was showing maximum coverage. (b) Re-plot of the data (A) with X-axis shifted right to highlight smaller scaffolds.

46

47

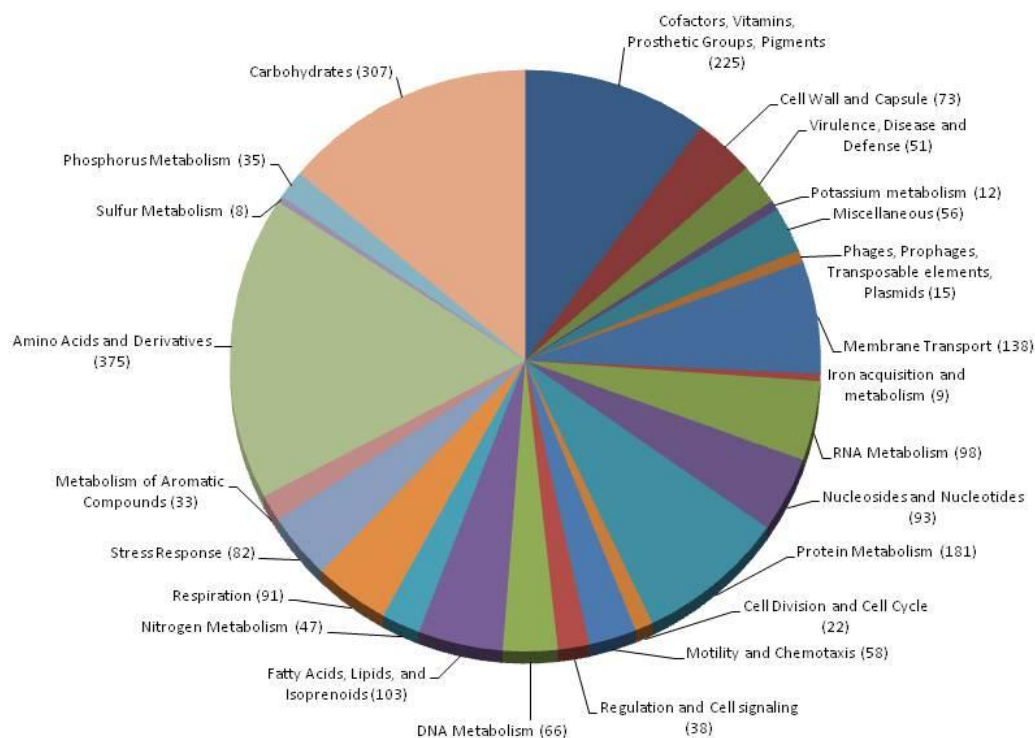

48

49

50 **Supplementary Figure 3. The distribution of genes containing SNPs in *B. melitensis* IND1**

51 **against other *B. melitensis* strains. *B. melitensis* IND1 genes carrying SNPs with respect to**

52 **any of the seven *B. melitensis* strains (*B. melitensis* 16M, *B. melitensis* Ether, *B. melitensis* NI, *B.***

53 ***melitensis* M5-90, *B. melitensis* M28, *B. melitensis* ATCC 23457) or *B. abortus* 2308 are**

54 **organized as per SEED sub-system annotation**
